# Supplementary material for: Sensible graphene oxide differentiates macrophages and Leishmania: a bio-nano interplay in attenuating intracellular parasite
Source: Royal Society of Chemistry journal article supplement (doi:10.1039/d0ra04266h), 2020-01-01
Supplement: d0ra04266h1.pdf [file d0ra04266h1.pdf]

## Sensible graphene oxide differentiates macrophages and *Leishmania*: Bio-nano interplay in attenuating intracellular parasite

Aakriti Singh<sup>1†</sup>, Sandeep Sharma<sup>1†</sup>, Ganesh Yadagiri<sup>1</sup>, Shabi Parvez<sup>1</sup>, Ritika Gupta<sup>5</sup>, Nitin Kumar Singhal<sup>5</sup>, Nikhil Koratkar<sup>2</sup>, Om Prakash Singh<sup>3,4</sup>, Shyam Sundar<sup>3</sup>, Vijayakumar Shanmugam<sup>1\*</sup> and Shyam Lal Mudavath<sup>1\*</sup>

<sup>1</sup>Institute of Nano Science and Technology, Habitat Centre, Phase- 10, Sector- 64, Mohali, Punjab, 160062, India.

<sup>2</sup>Mechanical, Aerospace and Nuclear Engineering, Rensselaer Polytechnic Institute, 110, 8<sup>th</sup> Street, Troy, New York, 12180, USA.

<sup>3</sup>Infectious Disease Research Laboratory, Department of Medicine, Institute of Medical Sciences, Banaras Hindu University, Varanasi, Uttar Pradesh, 221005, India.

<sup>4</sup>Department of Biochemistry, Institute of Science, Banaras Hindu University, Varanasi, Uttar Pradesh, 221005, India.

<sup>5</sup>National Agri-Food Biotechnology Institute, C-127, Industrial Area, S.A.S. Nagar, Phase 8, Sahibzada Ajit Singh Nagar, Punjab 160071, India

\*Author for correspondence: shyamlal@inst.ac.in, shavs0502@gmail.com, psvijayakumar@inst.ac.in, vijayakumarshanmugham@gmail.com

†equally contributed authors

### Supplementary information

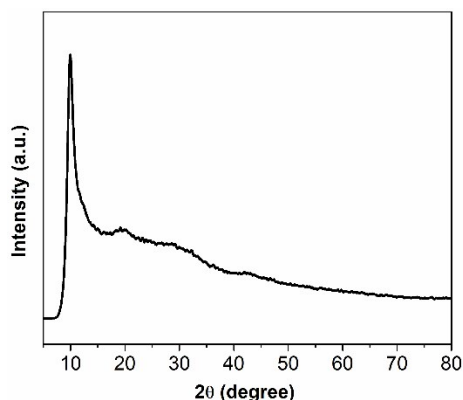

Fig. S1 XRD pattern of GO.

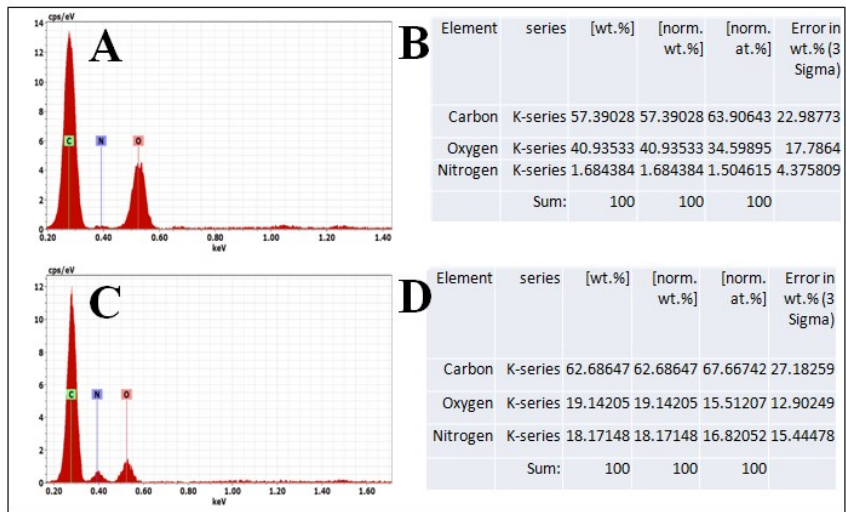

**Fig. S2** EDX spectrum of GO (A and B), and AGO (C and D).

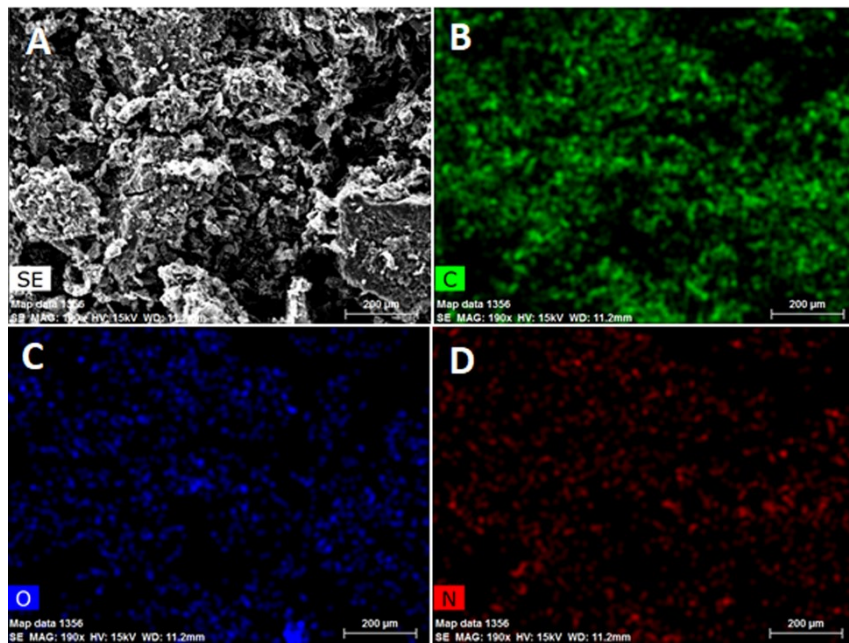

**Fig. S3** SEM image of (A) AGO and corresponding quantitative EDX element mapping of (B) C, (C) O and (D) N.

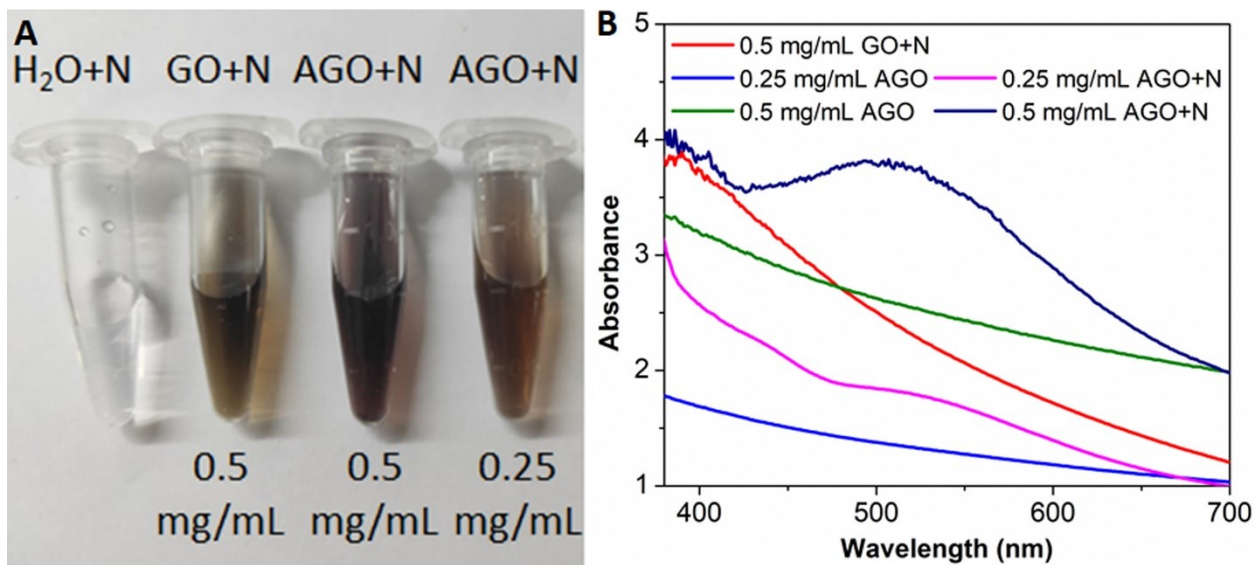

**Fig. S4** (A) Images, and (B) absorbance spectra of GO and AGO after reaction with ninhydrin.

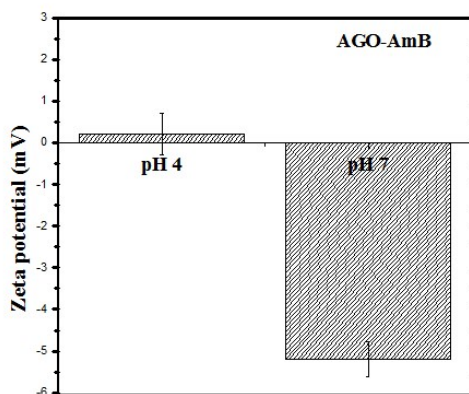

**Fig. S4** Zeta potential of AGO-AmB at pH 4 and pH 7.

**Table S1** Number of amastigotes/100 macrophages in untreated control and treatment groups (Mean±SD).

| Conc. (µg/mL) | AGO-AmB     | GO-AmB    | AmBisome   | AmB         | AGO       | GO        |
|---------------|-------------|-----------|------------|-------------|-----------|-----------|
| <b>0.0625</b> | 201.5±24.74 | 211±24.04 | 219.5±2.12 | 230.5±20.50 | 297±16.97 | 297±16.97 |

|                   |             |             |             |             |             |               |
|-------------------|-------------|-------------|-------------|-------------|-------------|---------------|
| <b>0.125</b>      | 125.5±13.45 | 126.5±0.70  | 160.5±6.36  | 164±18.38   | 296.5±17.67 | 296.5±17.67   |
| <b>0.25</b>       | 87.5±3.53   | 100.5±12.02 | 102.5±17.67 | 113.5±17.67 | 297±16.97   | 297.5±17.67   |
| <b>0.50</b>       | 52±2.82     | 66.5±12.02  | 70.5±7.77   | 98.5±21.92  | 297±16.9    | 297.5±17.67   |
| <b>1</b>          | 22.5±10.60  | 34±2.82     | 49.5±2.12   | 73±15.55    | 297.5±17.67 | 297±16.97     |
| Untreated control |             |             |             |             |             | 297.5 ± 17.67 |
